# Supplementary figures and images for: Tetranuclear iron(iii) complexes of an octadentate pyridine-carboxylate ligand and their catalytic activity in alkane oxidation by hydrogen peroxide
Source: Royal Society of Chemistry journal article supplement (doi:10.1039/b512069a), 2005-10-10

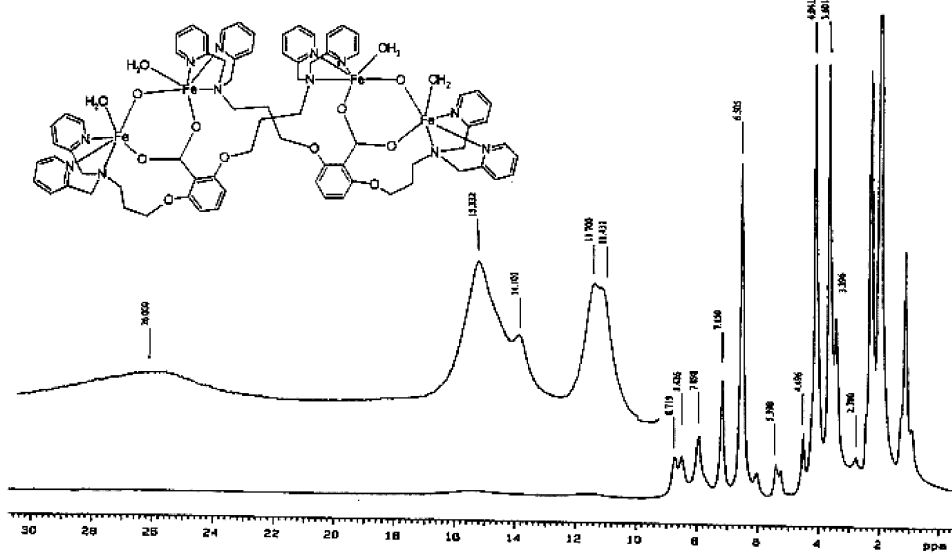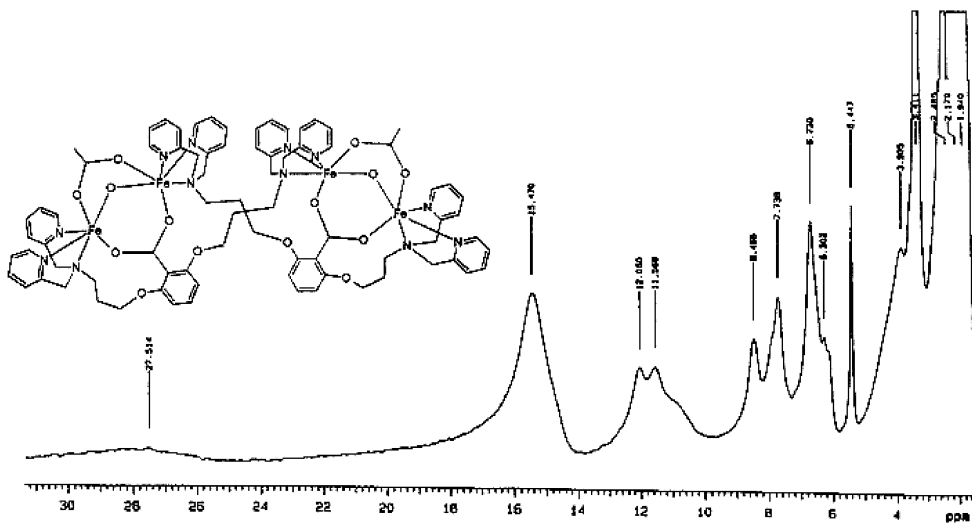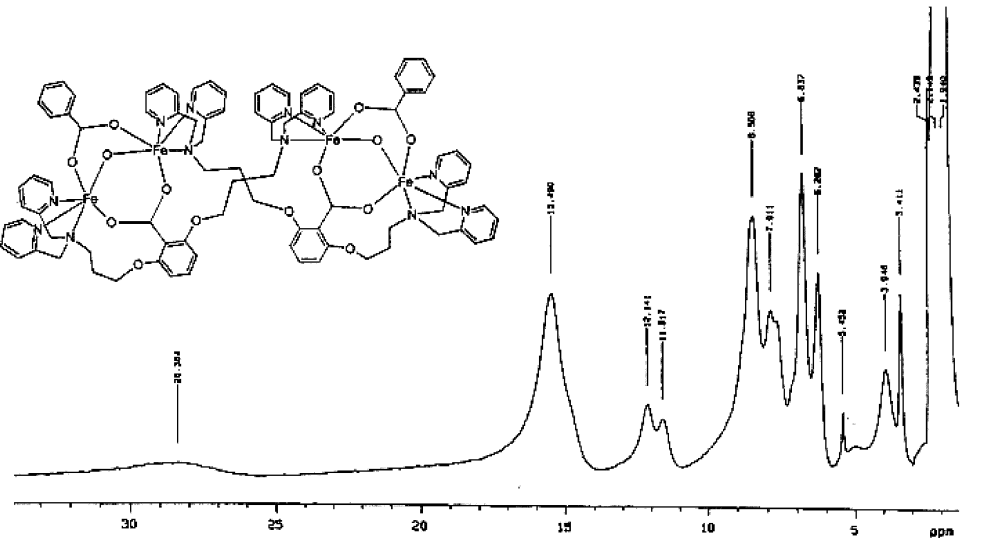

Supplement: b512069a.pdf [file b512069a.pdf]
